# Supplementary material for: Production of Acrylic Acid from Biomass-Derived Fumaric Acid under Hydrothermal Conditions
Source: MDPI journal article supplement (doi:10.3390/en14175456), 2021-09-02
Supplement: s1 [file s1]

Archive with 1 entries (1 files):
- energies-1341182-supplementary.pdf
